# Supplementary material for: Highly transparent and luminescent gel glass based on reabsorption-free gold nanoclusters
Source: Royal Society of Chemistry journal article supplement (doi:10.1039/d0nr01668c), 2020-01-01
Supplement: d0nr01668c1.pdf [file d0nr01668c1.pdf]

## Supplementary Files

### Highly transparent and luminescent gel glass based on reabsorption-free gold nanoclusters

Kun-Bin Cai<sup>1</sup>, Hsiu-Ying Huang<sup>1\*</sup>, Po-Wen Chen<sup>2</sup>, Xiao-Ming Wen<sup>3</sup>, Kai Li<sup>4</sup>, King  
Chester Capinig Co<sup>1</sup>, Ji-Lin Shen<sup>1</sup>, Kuo-Pin Chiu<sup>1</sup>, Chi-Tsu Yuan<sup>1,4,5\*</sup>

<sup>1</sup>Department of Physics, Chung Yuan Christian University, Taoyuan, Taiwan

<sup>2</sup>Physics Division, Institute of Nuclear Energy Research, Taoyuan, Taiwan

<sup>3</sup>Centre for Micro-Photonics, Swinburne University of Technology, Hawthorn  
Australia

<sup>4</sup>Master Program in Nanotechnology, Chung Yuan Christian University, Taoyuan,  
Taiwan

<sup>5</sup>R&D Center for Membrane Technology, Chung Yuan Christian University, Taoyuan,  
Taiwan

**Fig. S1. TEM image, size distribution and XPS data for as-synthesized AuNCs.**

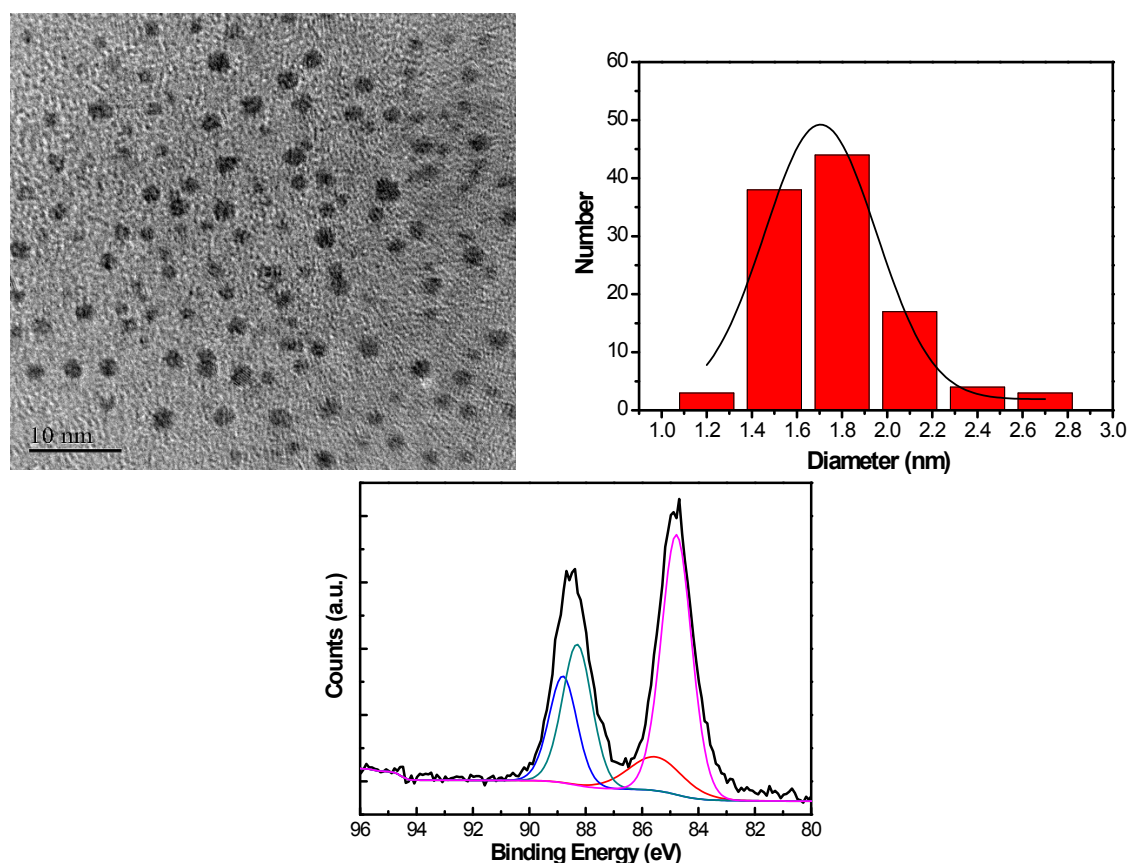

Fig. S2. The photographs for GSH-AuNCs in a glass matrix.

(a) *KH792 + GSH-AuNCs*

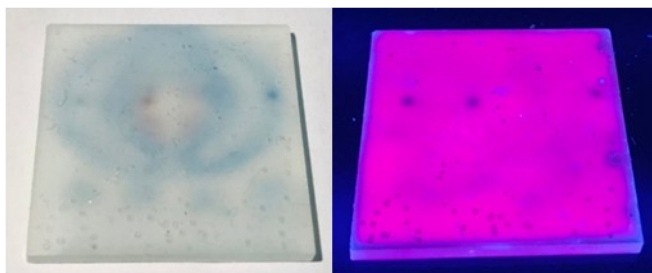

(b) *DBATES + GSH-AuNCs*

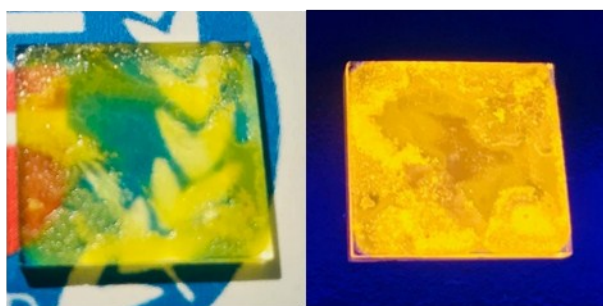

S3. Fitting results for DDAB-AuNCs dispersed in solvent and in glass.

|                        | DDAB-AuNCs  | DDAB-AuNC glasses |
|------------------------|-------------|-------------------|
| $A_1$                  | 0.38        | 0.45              |
| $\tau_1$               | 0.4 $\mu s$ | 8 $\mu s$         |
| $A_2$                  | 0.22        | 0.16              |
| $\tau_2$               | 3.6 $\mu s$ | 20.5 $\mu s$      |
| $A_3$                  | 0.26        | 0.2               |
| $\tau_3$               | 9 $\mu s$   | 10 $\mu s$        |
| $\langle \tau \rangle$ | 7.3 $\mu s$ | 13.1 $\mu s$      |

**Fig. S4. Fitting results for PL decay trace measured at 120 K and 80 K.**

The TRPL data were fitted using multi-exponential decay functions (bi-exponential decays for 80 K and tri-exponential decays for 120 K), as shown below.

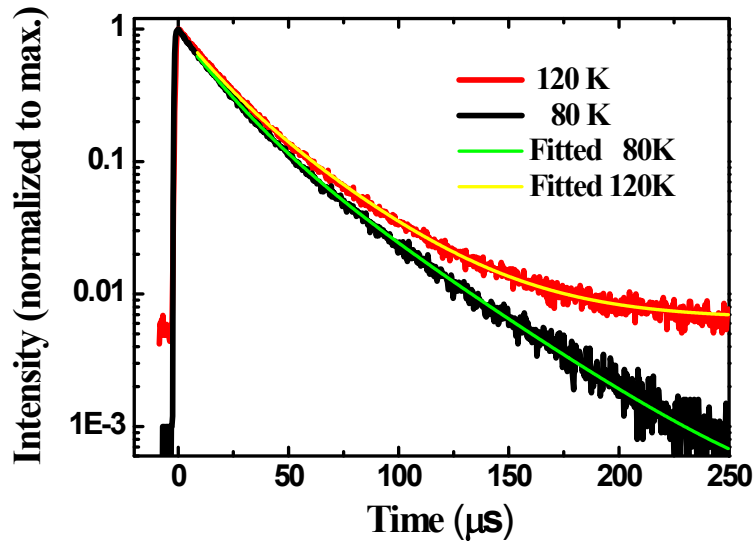

|          | <b>120K</b>                  |          | <b>80K</b>                   |
|----------|------------------------------|----------|------------------------------|
| $A_1$    | <b>0.21</b>                  | $A_1$    | <b>0.58</b>                  |
| $\tau_1$ | <b>14 <math>\mu s</math></b> |          |                              |
| $A_2$    | <b>0.48</b>                  | $\tau_1$ | <b>15 <math>\mu s</math></b> |
| $\tau_2$ | <b>21 <math>\mu s</math></b> | $A_2$    | <b>0.32</b>                  |
| $A_3$    | <b>0.2</b>                   |          |                              |
| $\tau_3$ | <b>45 <math>\mu s</math></b> | $\tau_2$ | <b>36 <math>\mu s</math></b> |
